# Supplementary material for: Tumor MHC Expression Guides First-Line Immunotherapy Selection in Melanoma
Source: MDPI journal article supplement (doi:10.3390/cancers12113374), 2020-11-14
Supplement: s1 [file s1]

## Supplementary Material

# Tumor MHC Expression Guides First-Line Immunotherapy Selection in Melanoma

Elena Shklovskaya, Jenny H Lee, Su Yin Lim, Ashleigh Stewart, Bernadette Pedersen, Peter Ferguson, Robyn PM Saw, John F Thompson, Brindha Shivalingam, Matteo S Carlino, Richard A Scolyer, Alexander M Menzies, Georgina V Long, Richard F Kefford and Helen Rizos

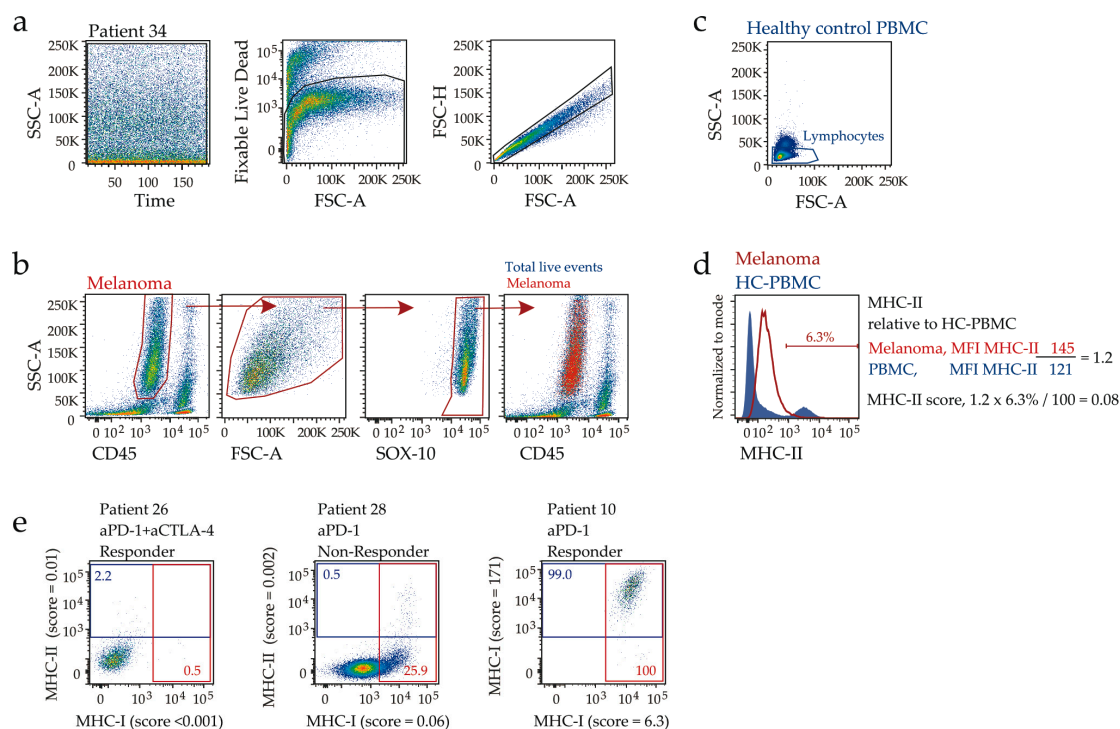

**Figure S1.** Flow cytometric analysis of melanoma cells in enzymatically dissociated tumor biopsies. (a) General gating (left to right): time gate, live cell gate, single cell gate. (b) Melanoma cell gating (left to right): CD45-negative, side scatter (SSC-A) high; forward scatter (FCS-A) high; SOX-10 positive; overlay of SOX-10 positive melanoma cells (red) onto total live events (pseudocolor plot). (c) Healthy control (HC) PBMC lymphocyte gating (SSC-A and FCS-A low). (d) MHC-II expression on tumor cells (red histogram) and control PBMC (blue shaded histogram). Fraction of melanoma cells expressing the marker is indicated. Calculations for melanoma MHC-II expression relative to HC-PBMC, and MHC-II expression score are shown (MFI, geometric mean fluorescent intensity). (e) Representative examples of MHC expression in three tumors, with frequency of positive (MHC-I, red; MHC-II, blue) and MHC expression scores indicated. Patient ID, therapy and treatment response are indicated above the plots.

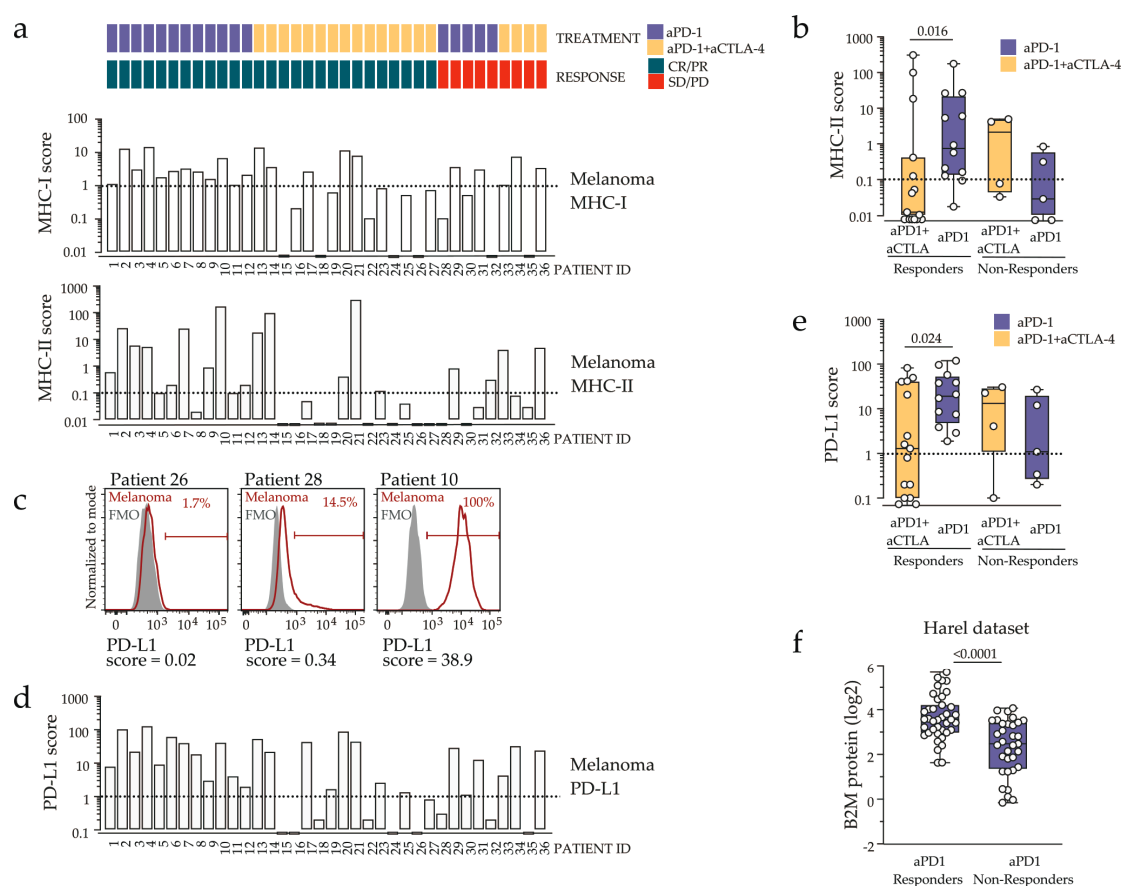

**Figure S2.** Flow cytometric evaluation of tumor MHC-I, MHC-II and PD-L1 expression in pretreatment biopsies. **(a)** Melanoma MHC-I and MHC-II expression scores for the 36 samples included in the study. Treatment, response status and patient ID are indicated. Dotted lines mark expression thresholds. **(b)** Melanoma MHC-II expression score stratified by therapy and patient response. Boxes show the interquartile range and the median, with Mann-Whitney's P values indicated. **(c)** Representative examples of PD-L1 expression for the three biopsies shown in Figure S1E. **(d,e)** Melanoma PD-L1 expression score for the 36 biopsies included in the study (d) stratified by therapy and patient response (e). Boxes show the interquartile range and the median, with Mann-Whitney's P values indicated. **(f)** B2M protein expression in pretreatment biopsies from 39 responders and 33 non-responders to anti-PD-1 monotherapy (Harel dataset, high-resolution liquid chromatography-mass spectrometry data after filtration for 70% valid values [1]). Mann-Whitney's P value is shown.

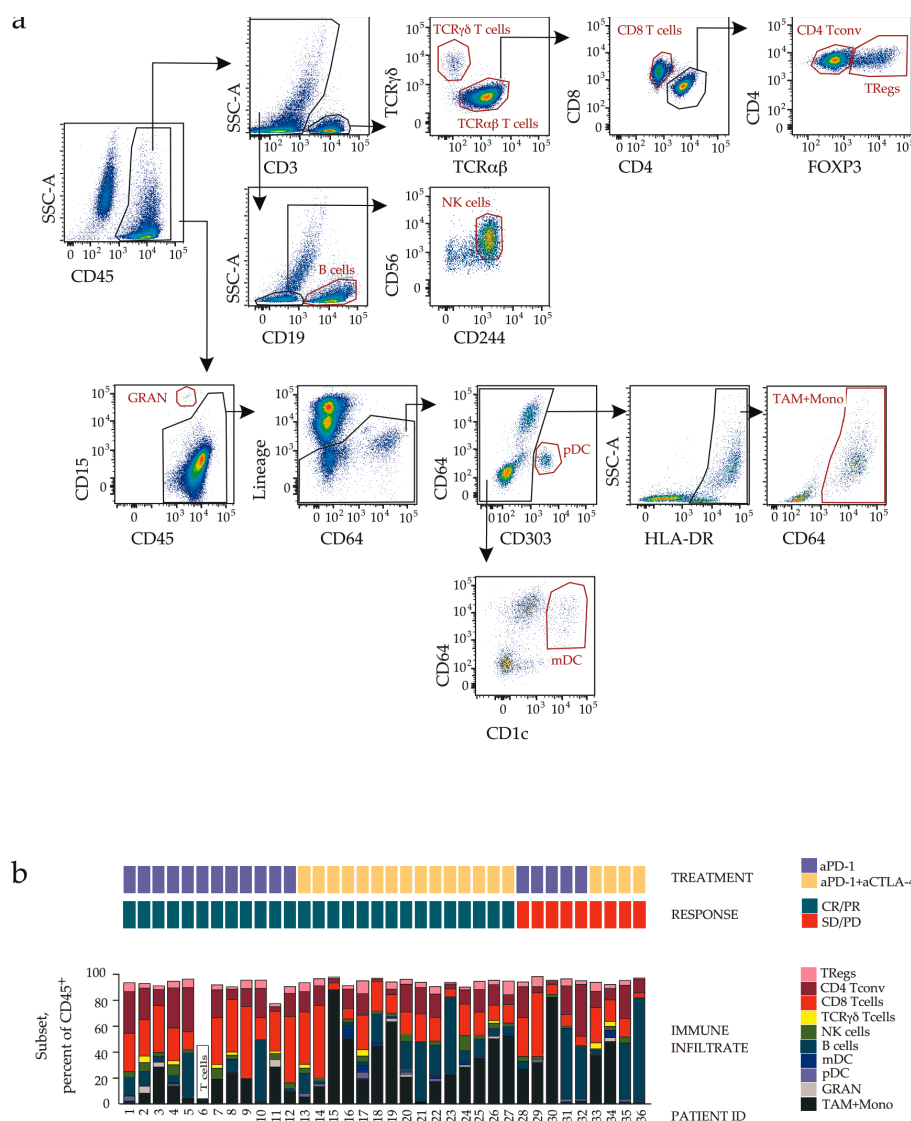

**Figure S3.** Immune contexture of individual melanoma biopsies. **(a)** Identification of tumor-infiltrating immune cells by flow cytometry. After gating CD45<sup>+</sup> events, lymphocytes were identified as follows (top row, left to right): SSC-A<sup>low</sup>CD3<sup>+</sup> T-cells; TCR $\gamma\delta$ <sup>+</sup> T-cells, and TCR $\alpha\beta$ <sup>+</sup> T-cells further gated for CD8<sup>+</sup> T-cells, Tconv (conventional CD4<sup>+</sup>FOXP3<sup>-</sup> T-cells) and TRegs (regulatory CD4<sup>+</sup>FOXP3<sup>+</sup> T-cells); (second row): CD3-negative events were gated for SSC-A<sup>low</sup>CD19<sup>+</sup> B-cells, and SSC-A<sup>low</sup>CD3<sup>neg</sup>CD19<sup>neg</sup> events were gated for CD244<sup>+</sup>CD56<sup>+</sup> natural killer (NK) cells. (Third row, left to right): Alternatively, CD45<sup>+</sup> events were gated for CD15<sup>+</sup>CD45<sup>int</sup> granulocytes (GRAN). Lineage-negative events (CD3<sup>-</sup>CD19<sup>-</sup>CD56<sup>-</sup>) were further gated for CD303<sup>+</sup> plasmacytoid dendritic cells (pDC), HLA-DR<sup>+</sup>CD1c<sup>+</sup> myeloid dendritic cells (mDC) or HLA-DR<sup>+/int</sup>CD64<sup>+</sup>SSC-A<sup>high/int</sup> tumor-associated macrophages and monocytes (TAM+Mono). Final gates for individual subsets are shown in red; general gating strategy (Figure S1a) was applied prior to gating. **(b)** Cellular composition of tumor microenvironment in all pretreatment biopsies shown as a fraction of CD45<sup>+</sup> cells. Limited analysis was performed for patient 6 due to insufficient material.

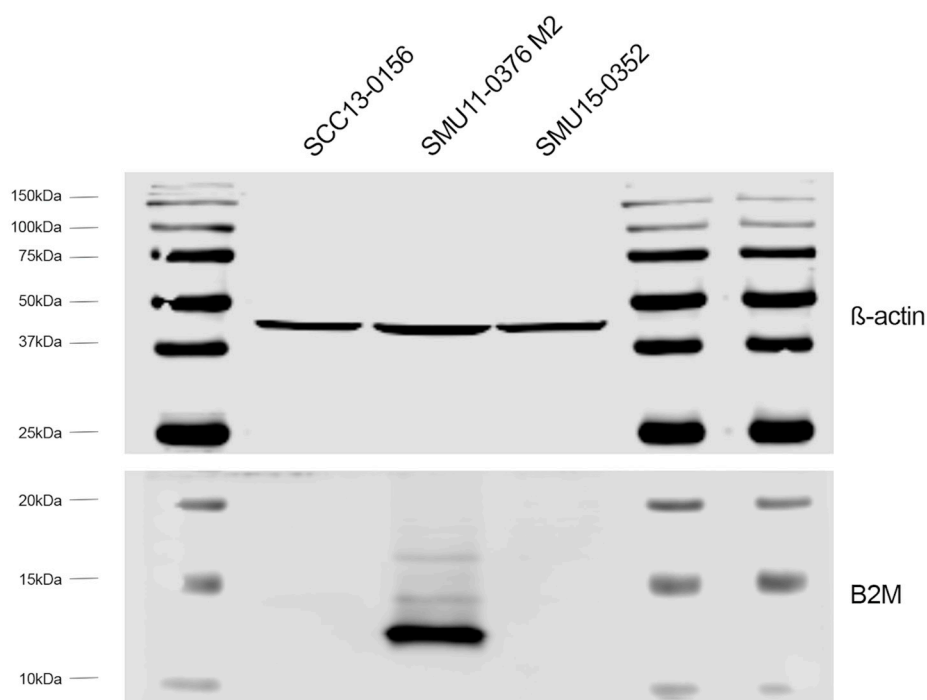

**Figure S4.** Uncropped images for Western blot gels used in Figure 1d.

**Table S1.** Antibodies and reagents used for flow cytometry.

| Marker      | Fluorescence  | Company         | Catalogue   |
|-------------|---------------|-----------------|-------------|
| CD1c/BDCA-1 | PECy7         | BioLegend       | 331516      |
| CD3         | BUV737        | BD Biosciences  | 564308      |
| CD3         | BV786         | BD Biosciences  | 565491      |
| CD4         | FITC          | BioLegend       | 344604      |
| CD4         | AF700         | BioLegend       | 357418      |
| CD8         | V500          | BD Biosciences  | 561617      |
| CD14        | V500          | BD Biosciences  | 561392      |
| CD15        | BV786         | BD Biosciences  | 741013      |
| CD16        | AF700         | BD Biosciences  | 557920      |
| CD19        | BUV737        | BD Biosciences  | 564304      |
| CD56        | PE            | Miltenyi Biotec | 130–113–874 |
| CD56        | BUV737        | BD Biosciences  | 564448      |
| CD64        | PE            | BioLegend       | 305007      |
| CD45        | BV711         | BioLegend       | 304050      |
| CD45        | BUV395        | BD Biosciences  | 563792      |
| CD45RO      | BUV395        | BD Biosciences  | 564291      |
| CD45RA      | BUV737        | BD Biosciences  | 564442      |
| CD134/OX40  | PE-Cy7        | BD Biosciences  | 563663      |
| CD137/4-1BB | PE-Dazzle 594 | BioLegend       | 309826      |
| CD141       | PE-Dazzle 594 | BioLegend       | 344120      |
| CD146/MCAM  | PE-CF594      | BD Horizon      | 564327      |
| CD223/LAG3  | PE            | Miltenyi Biotec | 130-105-452 |
| CD244       | PE-Cy7        | BioLegend       | 329520      |
| CD357/GITR  | BV421         | BD Biosciences  | 566423      |
| CD271/NGFR  | PE-Cy7        | BioLegend       | 345110      |
| CD273/PD-L2 | APC           | BioLegend       | 329608      |
| CD274/PD-L1 | BV421         | BioLegend       | 329714      |
| CD278/ICOS  | APC           | BioLegend       | 313510      |
| CD279/PD1   | BV421         | BD Biosciences  | 562516      |
| CD303       | BV421         | BD Biosciences  | 566427      |
| CD366/TIM3  | BV786         | BD Biosciences  | 742857      |

|                    |          |                          |                 |
|--------------------|----------|--------------------------|-----------------|
| EOMES              | PE-Cy7   | Thermo Fisher Scientific | 25–4877–42      |
| FC block           |          | BD Biosciences           | 564220          |
| FOXP3              | PE-CF594 | BD Biosciences           | 7235501         |
| FOXP3              | AF488    | BioLegend                | 320212          |
| Granzyme B         | AF700    | BD Biosciences           | 560213          |
| HLA-A, B, C        | AF700    | BioLegend                | 311438          |
| HLA-DR, DP, DQ     | BUV395   | BD Biosciences           | 740302          |
| KI67               | APC      | Thermo Fisher Scientific | 17–5699–42      |
| anti-human IgG4-Fc | PE       | Southern Biotech         | 9200–09         |
| Sox10              | AF488    | Santa Cruz               | sc-365692 AF488 |
| TBET               | BV421    | BD Biosciences           | 563318          |
| TCR $\alpha\beta$  | APC      | BioLegend                | 306718          |
| TCR $\gamma\delta$ | BV421    | BD Biosciences           | 744870          |
| TIGIT/VSTM3        | PE-Cy7   | BioLegend                | 372714          |
| LVE/DEAD Fixable   | NIR      | ThermoFisher Scientific  | L10119          |

## References

1. Harel M., Ortenberg R., Varanasi S.K., Mangalhara K.C., Mardamshina M., Markovits E., *et al.* Proteomics of Melanoma Response to Immunotherapy Reveals Mitochondrial Dependence. *Cell* **2019**; 179: 236–250 e18.
